# Supplementary material
Source: publisher site journal article supplement (https://www.dovepress.com/article/347163)
Supplement: Supplementary file 1 [file get_supplementary_file.php]

**Supplementary materials
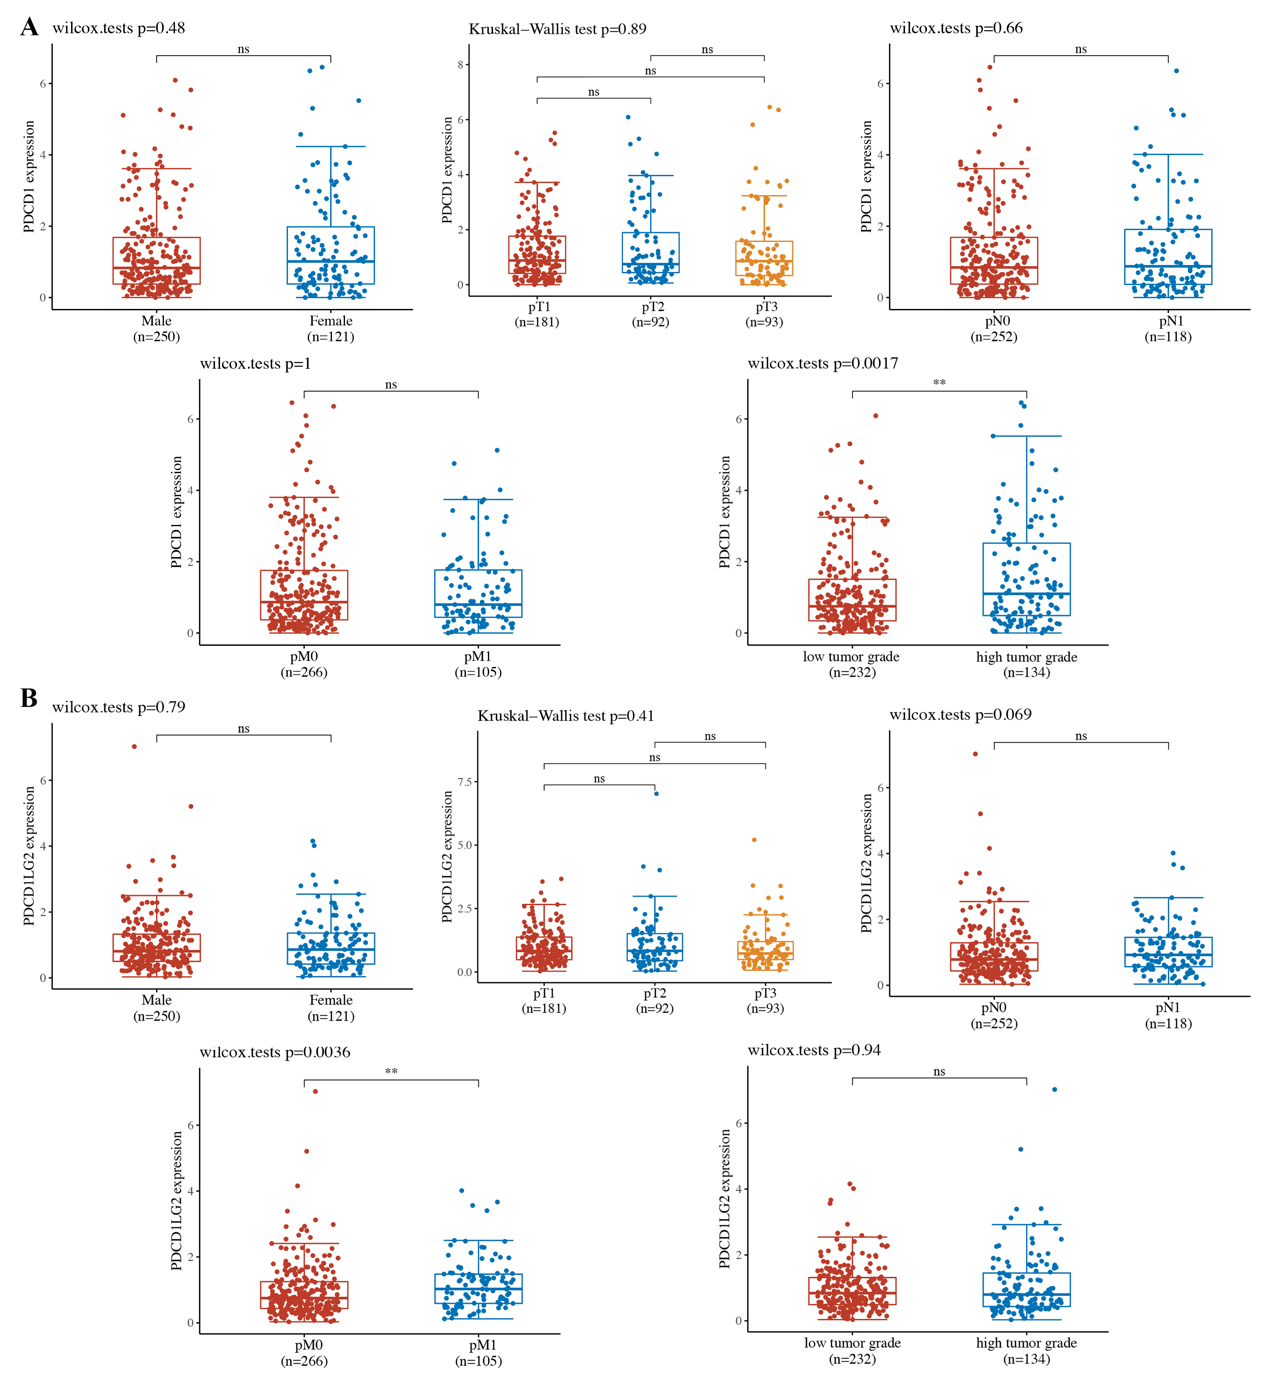
**

**Supplementary Figure 1. The association between immune checkpoints and the clinical parameters of HCC patients**. (A) The association between PDCD1 and the clinical parameters of HCC patients. (B) The association between PDCD1LG2 and the clinical parameters of HCC patients. **p<0.01.


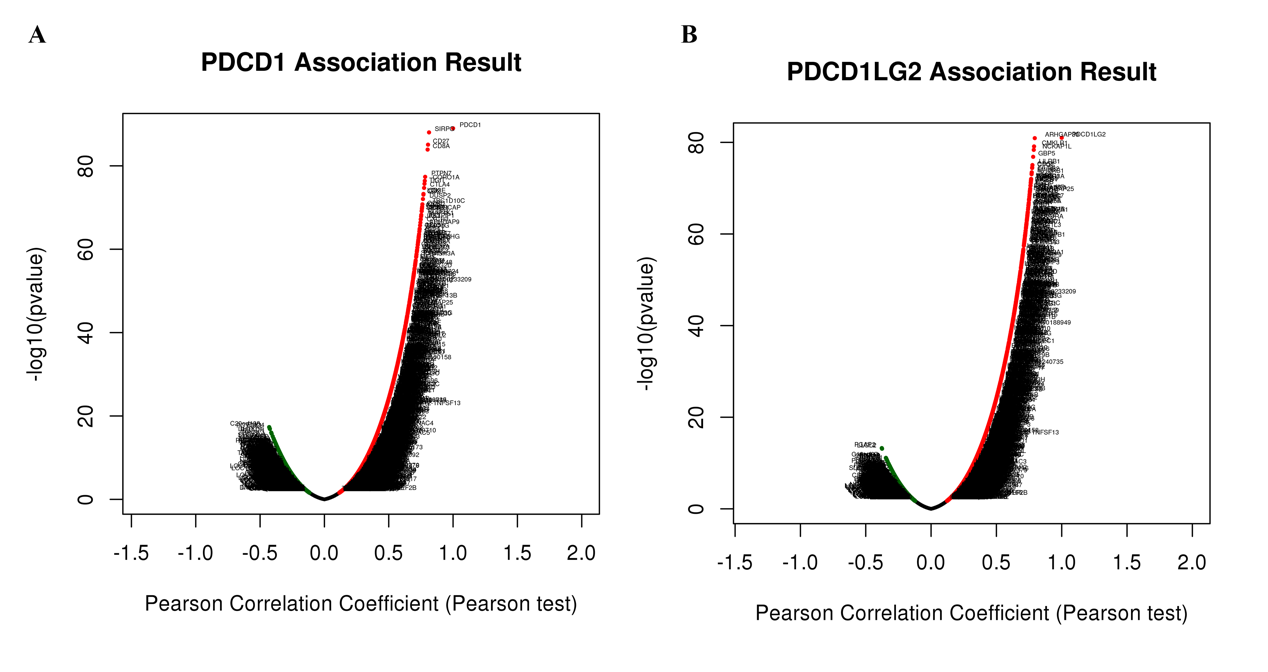


**Supplementary Figure 2. PDCD1/PDCD1LG2 associated genes in HCC.** (A) PDCD1 associated genes in TCGA HCC cohort. (A) PDCD1LG2 associated genes in TCGA HCC cohort.


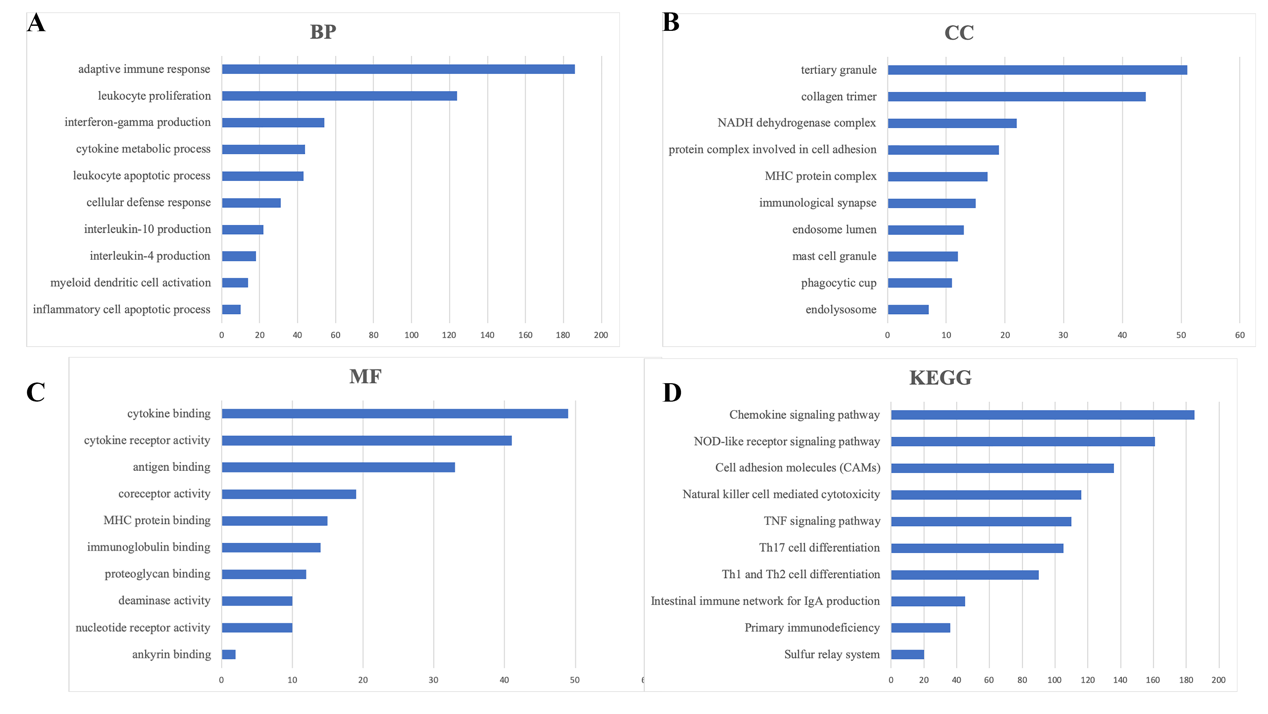


**Supplementary Figure 3. Functional enrichment analysis of PDCD1LG2 HCC.** (A) the enriched item in biological processes analysis. (B) the enriched item in cellular components analysis. (C) the enriched item in molecular functions analysis. (D) the enriched item in Kyoto Encyclopedia of Genes and Genomes analysis.
